# Supplementary material for: Mesenchymal stem cells protect against the tissue fibrosis of ketamine-induced cystitis in rat bladder
Source: PubMed Central journal article supplement (PMC4969614; doi:10.1038/srep30881), 2016-08-02
Supplement: srep30881-s1.pdf [file srep30881-s1.pdf]

## Supplementary Information

### Mesenchymal stem cells protect against the tissue fibrosis of ketamine-induced cystitis in rat bladder

Aram Kim<sup>1,†</sup>, Hwan Yeul Yu<sup>1,2,†</sup>, Jinbeom Heo<sup>2,3,†</sup>, Miho Song<sup>1</sup>, Jung-Hyun Shin<sup>1</sup>, Jisun Lim<sup>2,3</sup>, Soojung Yoon<sup>1,2</sup>, Yong Hwan Kim<sup>2,3</sup>, Seungun Lee<sup>2,3</sup>, Seong Who Kim<sup>4</sup>, Wonil Oh<sup>5</sup>, Soo Jin Choi<sup>5</sup>, Dong-Myung Shin<sup>2,3,\*</sup>, Myung-Soo Choo<sup>1,\*</sup>

<sup>1</sup>Department of Urology, <sup>2</sup>Department of Biomedical Sciences, <sup>3</sup>Department of Physiology, <sup>4</sup>Department of Biochemistry and Molecular Biology, Asan Medical Center, University of Ulsan College of Medicine, Seoul, Korea; <sup>5</sup>Biomedical Research Institute, MEDIPOST Co., Ltd., Seoul, Korea

<sup>†</sup>These authors contributed equally to this work.

**Running title:** MSC therapy for ketamine-induced cystitis

#### \*Correspondence:

Myung-Soo Choo, MD, PhD, Department of Urology, Asan Medical Center, University of Ulsan College of Medicine, 88 Olympic-ro 43-gil, Songpa-gu, Seoul 05505, Korea

Tel: 82-2-3010-3735; Fax: 82-2-477-8928; Email: mschoo@amc.seoul.kr

Dong-Myung Shin, Ph.D., Department of Biomedical Sciences, Asan Medical Center, University of Ulsan College of Medicine, 88 Olympic-ro 43-gil, Songpa-gu, Seoul 05505, Korea

Email: d0shin03@amc.seoul.kr

## Supplementary Figures and Figure Legends

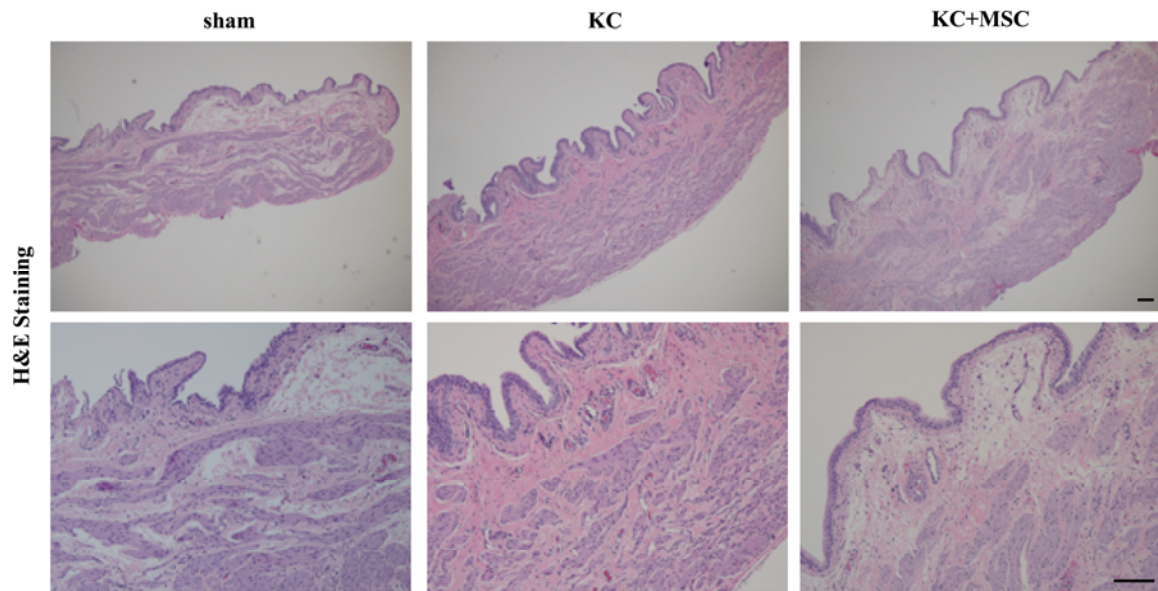

**Supplementary Figure S1. Histological analysis of the KC bladder.** Hematoxylin and eosin staining in the indicated bladder tissues. Nuclei were stained with Mayer's hematoxylin. The upper and lower images were at ×40 and ×100 magnification (scale bar = 100  $\mu\text{m}$ ), respectively. KC = ketamine-induced cystitis; MSC = mesenchymal stem cell.

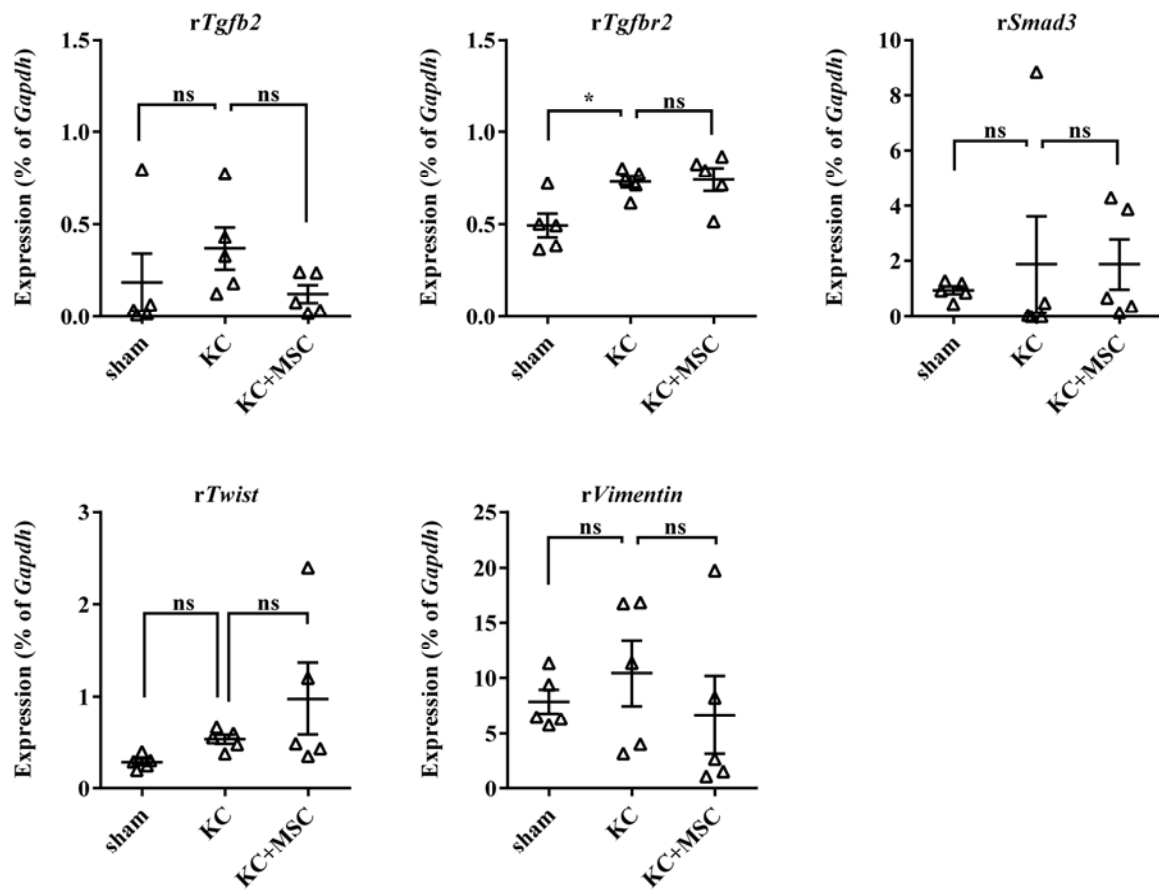

**Supplementary Figure S2. RQ-PCR analysis of tissue fibrosis-related genes in the indicated bladder tissues.** The expression level is presented as % *Gapdh* and shown as dot plot with the mean  $\pm$  SEM,  $n = 5$ , \* $p < 0.05$  compared with the KC group with Bonferroni post-test. ns = non-significant.

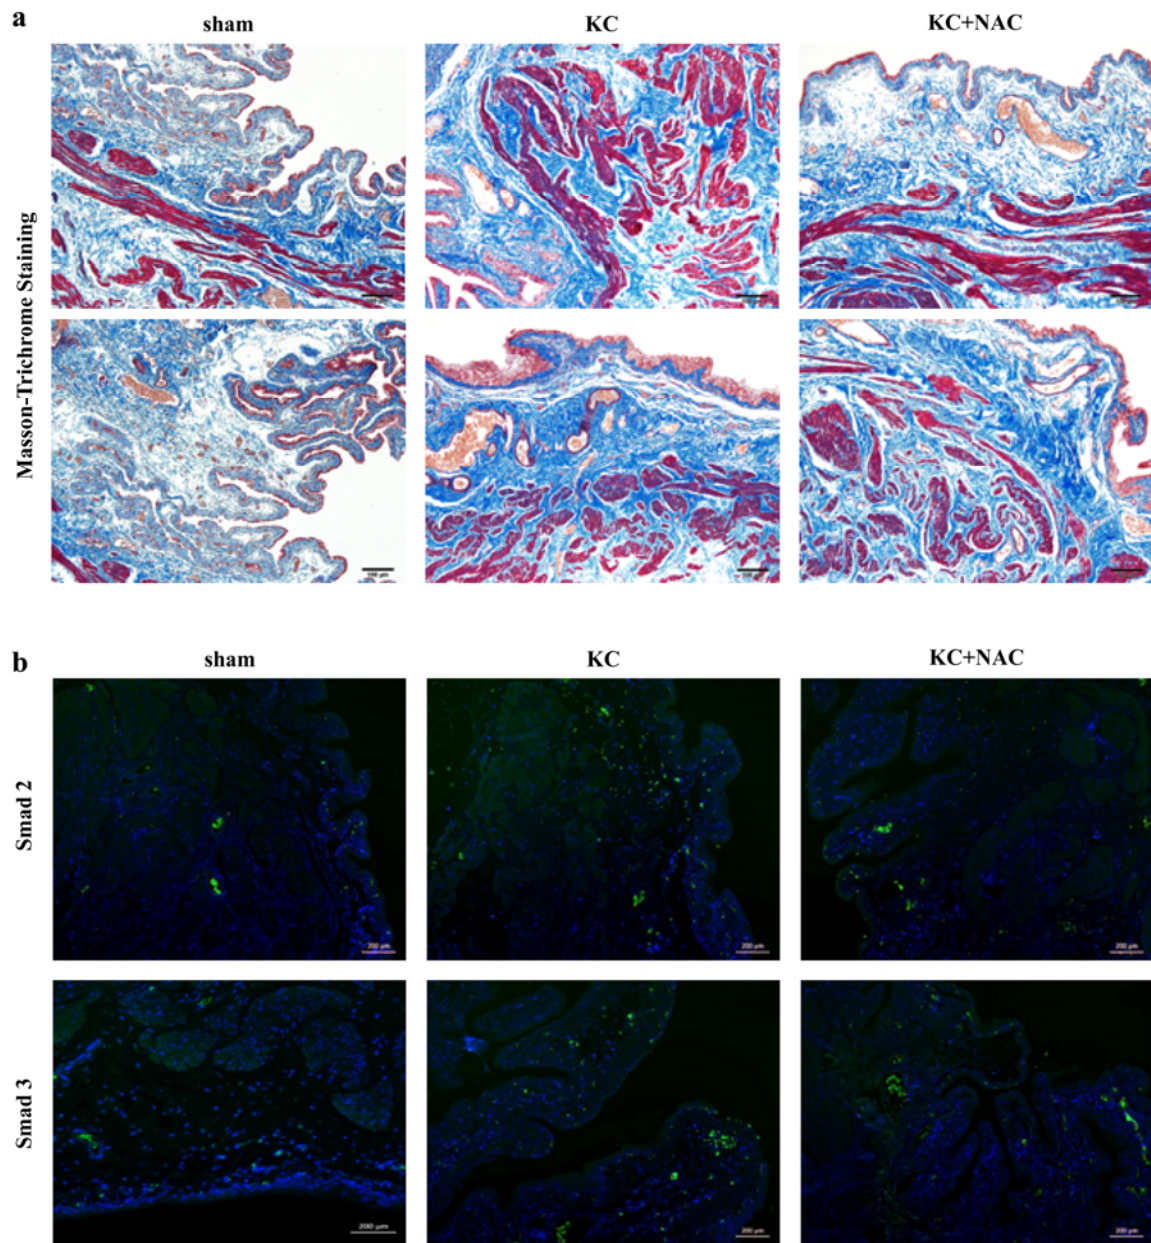

**Supplementary Figure S3. The beneficial effects of NAC on fibrotic changes in the KC bladder.**

(a) Masson's trichrome staining in the indicated bladder tissues (magnification  $\times 200$ ). Scale bar = 200  $\mu\text{m}$ . (b) Fluorescent immunostaining of phosphorylated Smad2 or Smad3 protein (green) at 2 d after the last injection of NAC (magnification  $\times 100$ ). Nuclei were stained with DAPI (blue). Scale bar = 200  $\mu\text{m}$ . KC = ketamine-induced cystitis; NAC = N-acetylcysteine.

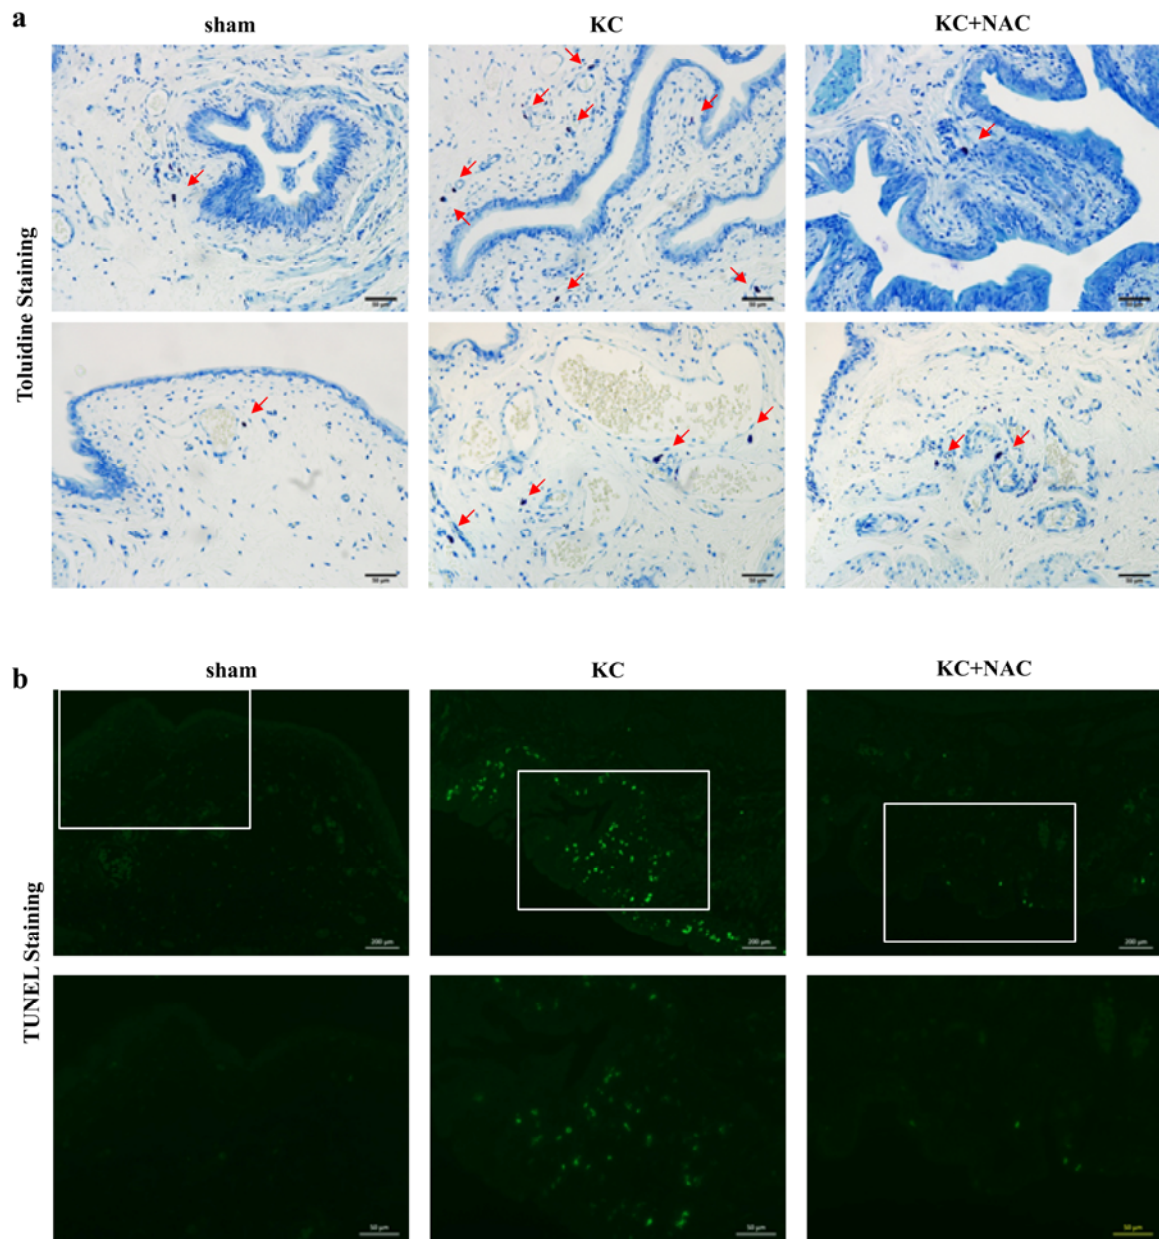

**Supplementary Figure S4. NAC therapy ameliorated the histological abnormalities of the KC bladder.** (a and b) Toluidine (a; magnification  $\times 200$ , scale bar = 50  $\mu\text{m}$ ) and TUNEL (b) staining in the indicated bladder tissues. The region characterized by apoptotic cells (box in upper image; magnification  $\times 100$ , scale bar = 200  $\mu\text{m}$ ) is shown in the lower panel at higher magnification ( $\times 200$ , scale bar = 50  $\mu\text{m}$ ).

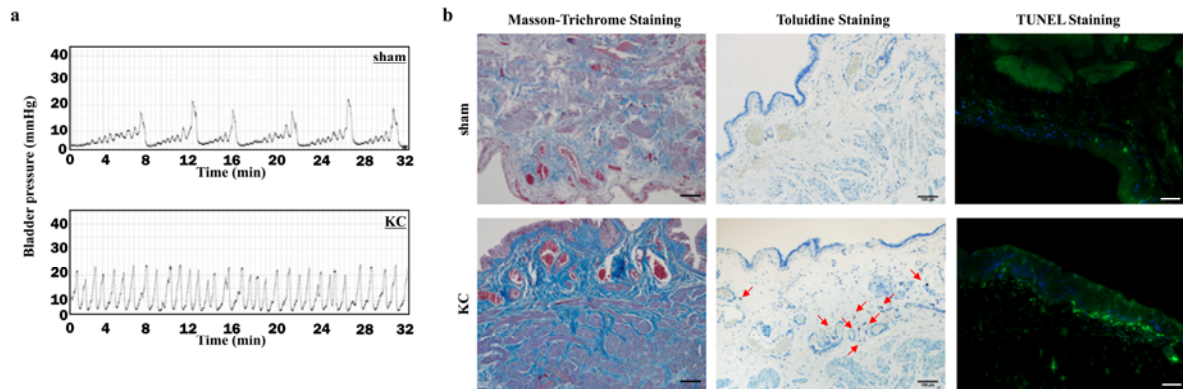

**Supplementary Figure S5. Validation of KC animal model.** (a) Representative conscious cystometry of the bladders 2 week after the initial the injection of 25 mg/kg ketamine prior to administration of human UCB-derived MSCs. (b) Histological analysis of ketamine-induced bladder injuries. (Left panel) Masson’s trichrome staining (magnification  $\times 100$ , scale bar = 100  $\mu\text{m}$ ). (Middle panel). Toluidine blue staining (magnification  $\times 100$ , scale bar = 100  $\mu\text{m}$ ). (Right panel) a TUNEL assay to detect the apoptotic cells (green) in the bladder sections (magnification  $\times 200$ , scale bar = 50  $\mu\text{m}$ ). Nuclei were stained with DAPI (blue). KC = ketamine-induced cystitis.

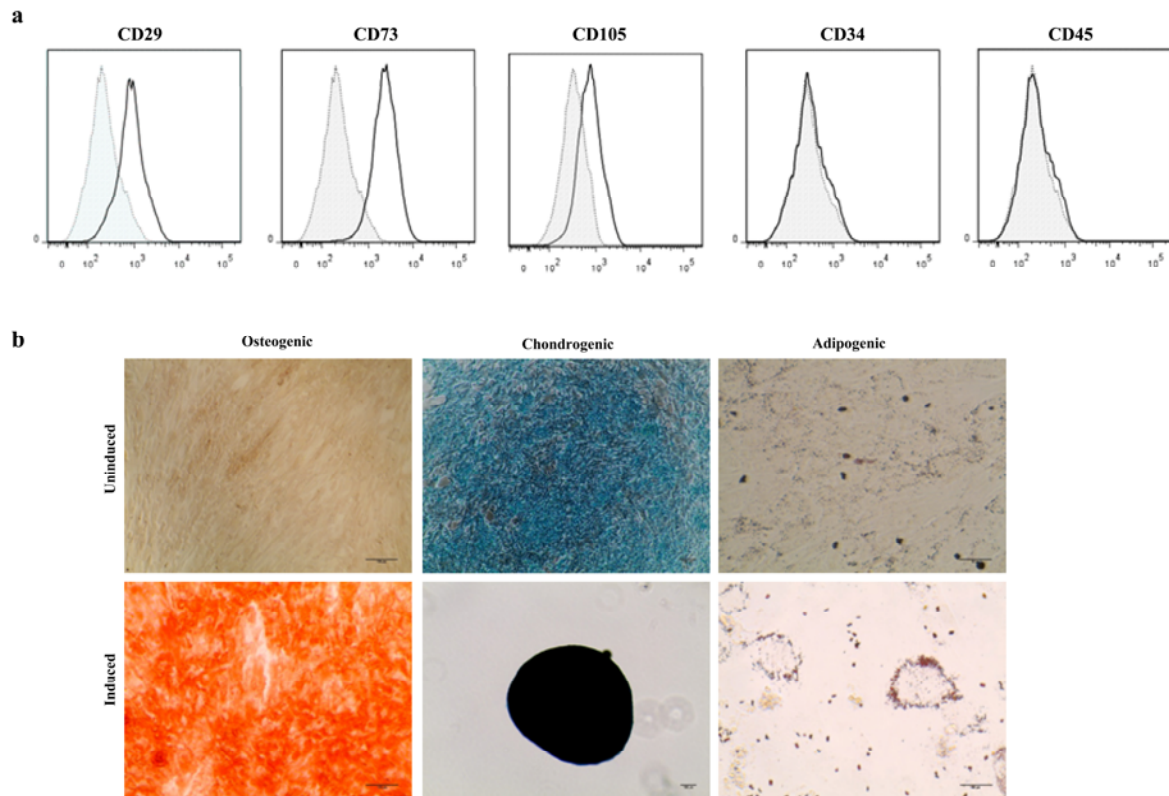

**Supplementary Figure S6. Characterization of MSCs.** (a) Flow cytometry analysis of the expression of the indicated MSC surface (CD29, CD73, and CD105) and hematopoietic (CD34, and CD45) lineage proteins in human UCB-derived MSCs used in this study. (b) Representative images of the osteogenic, chondrogenic, and adipogenic differentiation assays in which each lineage differentiation was determined using Alizarin Red S (magnification  $\times 200$ , scale bar = 100  $\mu\text{m}$ ), Alcian Blue (magnification  $\times 100$ , scale bar = 100  $\mu\text{m}$ ), and Oil Red O staining (magnification  $\times 200$ , scale bar = 50  $\mu\text{m}$ ), respectively.
